# Supplementary material for: Withdrawal Syndrome Following Discontinuation of 28 Antidepressants: Pharmacovigilance Analysis of 31,688 Reports from the WHO Spontaneous Reporting Database
Source: Springer Nature journal article supplement (doi:10.1007/s40264-022-01246-4), 2022-11-18
Supplement: MOESM1 [file 40264_2022_1246_MOESM1_ESM.pdf]

# Withdrawal syndrome following discontinuation of 28 antidepressants: pharmacovigilance analysis of 31,688 reports from the WHO spontaneous reporting database- Drug Safety

Chiara Gastaldon<sup>a\*</sup>, MD, PhD, Georgios Schoretsanitis<sup>b,c\*</sup>, MD, PhD, Elena Arzenton<sup>d</sup>, PhD, Emanuel Raschi<sup>e</sup>, MD, PhD, Davide Papola<sup>a</sup>, MD, PhD, Giovanni Ostuzzi<sup>a</sup>, MD, PhD, Ugo Moretti<sup>d</sup>, Erich Seifritz<sup>c</sup>, MD, John M. Kane<sup>b,f</sup> MD, Gianluca Trifirò<sup>d</sup>, MD, PhD, Corrado Barbui<sup>a</sup>, MD

<sup>a</sup> WHO Collaborating Centre for Research and Training in Mental Health and Service Evaluation, Department of Neuroscience, Biomedicine and Movement Sciences, Section of Psychiatry, University of Verona, Verona, Italy

<sup>b</sup> The Zucker Hillside Hospital, Department of Psychiatry, Northwell Health, Glen Oaks, New York, USA and Department of Psychiatry, Zucker School of Medicine at Northwell/Hofstra, Hempstead, NY, USA

<sup>c</sup> Department of Psychiatry, Psychotherapy and Psychosomatics, Hospital of Psychiatry, University of Zurich, Zurich, Switzerland

<sup>d</sup> Section of Pharmacology, Department of Diagnostics and Public Health, University of Verona, Italy

<sup>e</sup> Pharmacology Unit, Department of Medical and Surgical Sciences, University of Bologna, Bologna, Italy

<sup>f</sup> The Feinstein Institute for Medical Research, Center for Psychiatric Neuroscience, Manhasset, NY, USA

\*: Both authors contributed equally

Corresponding Author:

Chiara Gastaldon

Department of Neuroscience, Biomedicine and Movement Sciences; Section of Psychiatry; University of Verona; Piazzale L.A. Scuro, 10; 37134 Verona, Italy.

Phone: +39-045-8124063

e-mail: chiara.gastaldon@gmail.com

## Electronic Supplementary Material (ESM)

Table of contents

|                                                                                                                                                                                                                                                   |    |
|---------------------------------------------------------------------------------------------------------------------------------------------------------------------------------------------------------------------------------------------------|----|
| Additional Methods.....                                                                                                                                                                                                                           | 2  |
| Data source: the Vigibase® .....                                                                                                                                                                                                                  | 2  |
| Study design .....                                                                                                                                                                                                                                | 2  |
| Search strategy to identify cases.....                                                                                                                                                                                                            | 2  |
| Exclusion criteria.....                                                                                                                                                                                                                           | 2  |
| Statistical analyses.....                                                                                                                                                                                                                         | 2  |
| Identification of the clinical symptoms of the withdrawal syndrome .....                                                                                                                                                                          | 3  |
| Additional table 1. Criteria for the classification and prioritisation of relevant disproportionality signals.....                                                                                                                                | 3  |
| Additional Table 2. Mean prescribed dose for each antidepressant .....                                                                                                                                                                            | 4  |
| Additional Table 3. Reporting odds ratios (ROR) and information components (IC) for withdrawal Antidepressants-related withdrawal syndrome by class of antidepressant and for each antidepressant using buprenorphine as a positive control ..... | 5  |
| Additional Table 4. Disproportionality intraclass analysis for TCAs .....                                                                                                                                                                         | 5  |
| Additional Table 5. Disproportionality intraclass analysis for SSRIs.....                                                                                                                                                                         | 6  |
| Additional Table 6. Disproportionality intraclass analysis for other antidepressants .....                                                                                                                                                        | 6  |
| Additional Table 7. Evaluation and classification of relevant disproportionality signals .....                                                                                                                                                    | 8  |
| Additional Table 8. Symptoms reported in association with withdrawal reaction .....                                                                                                                                                               | 10 |
| Additional References .....                                                                                                                                                                                                                       | 11 |

## **Additional Methods**

### **Data source: the Vigibase®**

The WHO Programme for International Drug Monitoring (WHO PIDM) was established in 1968 as a result of the thalidomide crisis of the early 1960s. WHO PIDM currently has around 140 member countries (November 2020). In each participating country, the ministry of health, or equivalent, has appointed a national centre for pharmacovigilance that collects and manages Individual Case Safety Reports (ICSR) and is the national point of contact. These reports are transferred electronically to Vigibase®, the WHO global database of ICSRs ('report' denotes ICSR in this document) [1]. Vigibase® is maintained and developed by the UMC and members of the WHO PIDM can access and analyse this common resource using VigiLyze®, a signal detection and management tool provided by UMC.

Each ICSR includes anonymous administrative data (the country, the reporter's qualification, and a completeness score), patient information (age and gender), and information on medications (international non-proprietary name or trade name, anatomical therapeutic chemical [ATC] classification,[2] indication, date of onset, date of withdrawal, dosage, administration route, and adverse events coded according to the Medical Dictionary for Regulatory Activities version 23.1 [MedDRA®]) [3]. If a medication is considered to be probably responsible for the adverse event, it is defined as "suspect" or "interacting". If not, it is defined as "concomitant". Detailed information on the items contained in ICSRs are described on the UMC website [4]. According to WHO policy and the UMC's guidelines, ICSRs sent from member countries to Vigibase® are anonymized.

### **Study design**

#### Search strategy to identify cases

Cases of withdrawal syndrome were identified by searching for the preferred terms (PT) "withdrawal syndrome", "antidepressants discontinuation syndrome" and the sub-Standardized MedDRA Queries (sub-SMQs) "drug withdrawal".[3] We included reports involving the following 28 antidepressants: amitriptyline, nortriptyline, desipramine, imipramine, clomipramine, doxepin, lofepramine, fluoxetine, citalopram, paroxetine, sertraline, fluvoxamine, escitalopram, mianserin, trazodone, nefazodone, mirtazapine, bupropion, venlafaxine, milnacipran, reboxetine, duloxetine, agomelatine, desvenlafaxine, vortioxetine, esketamine, hypericum perforatum and vilazodone. Antidepressants were classified as tricyclics (TCAs) (ATC: N06AA; amitriptyline, clomipramine, imipramine, doxepin, nortriptyline, desipramine, lofepramine), SSRIs (ATC: N06AB; paroxetine, sertraline, fluoxetine, citalopram, escitalopram, fluvoxamine ), and other or "newer" antidepressants (ATC: N06AX; duloxetine, venlafaxine, desvenlafaxine, bupropion, mirtazapine, trazodone, nefazodone, vortioxetine, vilazodone, milnacipran, mianserin, reboxetine, hypericum perforatum, agomelatine, esketamine), based on the Anatomical Therapeutic Chemical (ATC) classification system [2].

#### Exclusion criteria

We excluded ICSRs concerning patients under 12 years of age as the use of antidepressants in childhood is controversial and in most of the cases off-label [5]. New-borns were also excluded as they suffer from neonatal withdrawal syndrome as a result of exposure during pregnancy or breast feeding. In terms of underlying mechanisms of pathophysiology and clinical features, this is a different clinical entity that deserves separate attention and has previously been addressed and characterized [6].

### **Statistical analyses**

We provided descriptive statistics on demographic and clinical characteristics of reported cases. We provided frequencies and percentages for sex, country of origin, number of serious reactions, number of cases with other psychotropic medications. Means and standard deviations were provided for age, dose, duration of treatment and duration of the reaction. Mean doses were provided in mg for each single drug and as for antidepressants overall we calculated the mean overall dose based on the defined daily dose or DDD [7].

Two different disproportionality approaches were performed to increase consistency and robustness of findings. We estimated the reporting odds ratio (ROR) [8, 9], and the Bayesian information component (IC) [10], for all AEs with threat least four reports using the R packages PhViD and BCPNN. The ROR is the odds of

exposure to a specific drug among the cases divided by the odds of exposure to the same drug in the non-cases [8, 9, 11]. The IC is a shrinkage-based measure of observed-to-expected disproportionality [12]. Higher ROR/IC estimates reflect stronger disproportionality. Ninety-five percent confidence intervals (CIs) were estimated for both ROR and IC. The ROR was deemed statistically significant if the lower limit of the CI is >1,[8] for IC, when the lower limit of CI of the IC is >0.10.

The ROR (also known as frequentist method) is largely used because it is relatively easy to understand, interpret and compute for clinicians (it is based on the same principles of calculation using the 2x2 table). This statistical measure expresses the extent to which the reported AE is associated with the suspected drug compared with the other drugs in the database. The occurrence of AEs related to other drugs in the database is used as a proxy for the background incidence of AEs (the denominator is unknown in pharmacovigilance). Conversely, IC is a Bayesian method based on Bayes' law to estimate the probability (posterior probability) that the suspected event occurs given the use of suspect drug.

Although several studies have examined and compared the performance of different algorithms, the accuracy in terms of sensitivity, specificity, and early identification of safety issues is largely comparable, especially when the number of cases (AEs) is more than 3. Therefore, there is no recognized gold standard methodology [13]. In other words, the choice of a disproportionality statistical approach does not appreciably affect the performance in terms of signal detection, and the absolute performance depends on the database size and features, as well as the level of confounding. When the level of confounding increases and/or the effect sizes become larger, Bayesian approaches may be preferable [14]. Overall, the performance of studies using disproportionality algorithms is noteworthy (i.e., the capacity to discriminate true from false positive drug–event associations), especially for adverse events with low/rare background incidence and a likely drug-attributable component such as torsade de pointes. Notably, large concordance was demonstrated between disproportionality measures (ROR) and relative risks emerged in formal analytical studies for a set of known AEs, thus providing a rough indication of the clinical significance of the signal strength [15].

For these reasons we have used two different approaches for signal detection, to increase the robustness of findings and reduce the likelihood of false positives; in our study, both methods were used for signal detection, and when the two disproportionality measures for a given AE met the criteria for statistical significance a safety signal for the AE was considered.

### Serious vs non-serious reactions

We performed secondary analyses between serious and non-serious reports of withdrawal syndrome. The following characteristics were considered: age (both as a continuous and dichotomous variable, i.e., adolescents <18 years and adults ≥18), sex (female and male), antidepressant dose (as mean and standard deviation (SD) of the defined daily dose (DDD)), [2] treatment duration (mean and SD in months), duration of the withdrawal syndrome (mean and SD in days) and type of concomitant therapy. As concomitant therapies, we considered other psychotropic drugs, and cases were grouped as cases with mood stabilizers, with benzodiazepines, with other antidepressants and with antipsychotics. We also considered the number of concomitant psychotropics drugs, grouping cases in cases with >2, >3 or >4 comedications.

### Identification of the clinical symptoms of the withdrawal syndrome

To identify the most commonly reported symptoms and signs of antidepressant-related withdrawal syndrome we selected only cases with one suspected drug, i.e. the suspected antidepressant. This approach was employed to minimize the risk of confounders due to co-suspected drugs, assuring that the co-reported symptoms were associated only with the suspected antidepressant and not with other co-reported psychotropic or non-psychotropic medications. Symptoms and signs were reported with absolute numbers (n) and frequency of reporting (%).

**Table 1. Criteria for the classification and prioritisation of relevant disproportionality signals**

| Clinical priority features for each drug                                 | 2 points | 1 point | 0 point |
|--------------------------------------------------------------------------|----------|---------|---------|
| Number of cases of withdrawal syndrome/Total number of reports of any AE | >10%     | 5-10%   | 0-4%:   |

|                                                                                                                                                           |                                              |                                        |                                     |
|-----------------------------------------------------------------------------------------------------------------------------------------------------------|----------------------------------------------|----------------------------------------|-------------------------------------|
| Number of cases of withdrawal syndrome without confounders/number of all cases of withdrawal                                                              | >71%                                         | 51-70%                                 | ≤50%                                |
| Significant ROR and IC- consistent across different analyses<br>(in the main analysis, in the intraclass analysis and with buprenorphine as a comparator) | ROR and IC significant in all three analyses | ROR and IC significant in two analyses | ROR and IC significant one analysis |
| Magnitude of the lower limit of the 95% CI of the ROR                                                                                                     | ..                                           | >10                                    | 0-10                                |

AEs: adverse events; IC: information component; ROR: reporting odds ratio.

Confounders were defined as all drugs that can cause withdrawal syndrome, i.e., other psychotropic drugs (such as other antidepressants, antipsychotics, benzodiazepines), opioids, any other substance of abuse. Antidepressants with statistically significant disproportionate reporting were ranked based on a semiquantitative score assessing four different items. Based on computed scores of 0–1, 2-5 or 6-7, we classified respectively antidepressants as having potentially weak (green light), moderate (yellow light) or strong (red light) association with withdrawal syndrome

**Table 2. Mean prescribed dose for each antidepressant**

| Drug           | n of cases | Mean dose ± sd (mg) |
|----------------|------------|---------------------|
| Agomelatine    | 12         | 37.5 ± 13.36        |
| Amitriptyline  | 251        | 264.5 ± 113.34      |
| Bupropion      | 551        | 180.3 ± 212.96      |
| Citalopram     | 646        | 22.81 ± 14.52       |
| Clomipramine   | 143        | 85.59 ± 68.08       |
| Desipramine    | 33         | 142.2 ± 101.45      |
| Desvenlafaxine | 1,676      | 64.95 ± 36.48       |
| Doxepin        | 71         | 67.10 ± 68.07       |
| Duloxetine     | 8,535      | 50.73 ± 23.3        |
| Escitalopram   | 535        | 12.41 ± 8.38        |
| Esketamine     | 5          | 56.25 ± 37.72       |
| Fluoxetine     | 749        | 18.4 ± 7.72         |
| Fluvoxamine    | 122        | 117.3 ± 94.88       |
| Imipramine     | 76         | 117.9 ± 77.40       |
| Lofepramine    | 8          | 105.25 ± 89.98      |
| Mianserin      | 31         | 29.25 ± 27.44       |
| Mirtazapine    | 270        | 29.97 ± 29.54       |
| Nefazodone     | 121        | 298.3 ± 168.67      |
| Nortriptyline  | 56         | 56.34 ± 56.34       |
| Reboxetine     | 17         | 5.32 ± 2.92         |
| Paroxetine     | 9,899      | 5.25 ± 9.14         |
| Sertraline     | 1,757      | 43.32 ± 27.96       |
| Trazodone      | 167        | 140.50 ± 112.72     |
| Venlafaxine    | 5,861      | 119.8 ± 97.31       |
| Vilazodone     | 47         | 25.27 ± 14.59       |
| Vortioxetine   | 49         | 11.67 ± 6.41        |

n of cases: number of cases of withdrawal syndrome; sd: standardized deviation; mg: milligrams.

Note: this was calculated based on the cases that reported the dose (n).

**Table 3. Reporting odds ratios (ROR) and information components (IC) for withdrawal Antidepressants-related withdrawal syndrome by class of antidepressant and for each antidepressant using buprenorphine as a positive control**

| Drug                         | n cases | n non-cases | ROR   | Lower 95%CI | Upper 95%CI | IC     | Lower 95%CI | Upper 95%CI |
|------------------------------|---------|-------------|-------|-------------|-------------|--------|-------------|-------------|
| Antidepressants              | 31,846  | 600,050     | 1.45  | 1.4         | 1.51        | 0.05   | 0.03        | 0.06        |
| Tricyclics                   | 667     | 64,091      | 0.29* | 0.26        | 0.31        | -1.24* | -1.37       | -1.15       |
| SSRIs                        | 14,050  | 276,560     | 1.39  | 1.34        | 1.45        | 0.09   | 0.06        | 0.11        |
| Newer                        | 17,659  | 279,014     | 1.73  | 1.67        | 1.81        | 0.13   | 0.11        | 0.15        |
| <b>Tricyclics</b>            |         |             |       |             |             |        |             |             |
| Amitriptyline                | 261     | 3,384       | 0.24* | 0.21        | 0.27        | -1.71* | -1.91       | -1.56       |
| Clomipramine                 | 150     | 9,539       | 0.43* | 0.37        | 0.51        | -1.09* | -1.36       | -0.89       |
| Imipramine                   | 84      | 5,473       | 0.42* | 0.34        | 0.52        | -1.16* | -1.52       | -0.9        |
| Doxepin                      | 74      | 6,333       | 0.32* | 0.25        | 0.4         | -1.53* | -1.92       | -1.25       |
| Nortriptyline                | 69      | 7,512       | 0.25* | 0.2         | 0.32        | -1.85* | -2.25       | -1.56       |
| Desipramine                  | 34      | 2,450       | 0.38* | 0.27        | 0.53        | -1.32* | -1.89       | -0.91       |
| Lofepramine                  | 8       | 3,314       | 0.07* | 0.03        | 0.13        | -3.74* | -4.95       | -2.94       |
| <b>SSRIs</b>                 |         |             |       |             |             |        |             |             |
| Paroxetine                   | 10,074  | 60,069      | 4.6   | 4.41        | 4.8         | 0.76   | 0.73        | 0.78        |
| Sertraline                   | 1,900   | 70,754      | 0.74* | 0.69        | 0.78        | -0.24* | -0.32       | -0.18       |
| Fluoxetine                   | 853     | 71,982      | 0.32* | 0.3         | 0.35        | -1.05* | -1.16       | -0.97       |
| Citalopram                   | 670     | 35,771      | 0.51* | 0.47        | 0.56        | -0.71* | -0.84       | -0.62       |
| Escitalopram                 | 590     | 32,499      | 0.5*  | 0.46        | 0.54        | -0.76* | -0.9        | -0.66       |
| Fluvoxamine                  | 130     | 9,771       | 0.36* | 0.31        | 0.44        | -1.32* | -1.61       | -1.11       |
| <b>Other antidepressants</b> |         |             |       |             |             |        |             |             |
| Duloxetine                   | 8,583   | 56,620      | 4.16  | 3.98        | 4.34        | 0.76   | 0.72        | 0.79        |
| Venlafaxine                  | 6,203   | 57,065      | 2.98  | 2.85        | 3.12        | 0.65   | 0.61        | 0.68        |
| Desvenlafaxine               | 1,701   | 16,121      | 2.89  | 2.72        | 3.08        | 1.06   | 0.98        | 1.12        |
| Bupropion                    | 566     | 63,236      | 0.25* | 0.22        | 0.27        | -1.42* | -1.56       | -1.32       |
| Mirtazapine                  | 306     | 26,755      | 0.31* | 0.28        | 0.35        | -1.37* | -1.56       | -1.23       |
| Trazodone                    | 230     | 19,235      | 0.33* | 0.29        | 0.38        | -1.38* | -1.6        | -1.22       |
| Nefazodone                   | 126     | 8,600       | 0.4*  | 0.34        | 0.48        | -1.2*  | -1.49       | -0.99       |
| Vortioxetine                 | 60      | 13,363      | 0.12* | 0.1         | 0.16        | -2.78* | -3.21       | -2.47       |
| Vilazodone                   | 55      | 4,843       | 0.31* | 0.24        | 0.41        | -1.58* | -2.03       | -1.26       |
| Milnacipran                  | 40      | 4289        | 0.26* | 0.19        | 0.35        | -1.86* | -2.39       | -1.48       |
| Mianserin                    | 35      | 7,173       | 0.13* | 0.1         | 0.19        | -2.74* | -3.3        | -2.34       |
| Reboxetine                   | 21      | 2,184       | 0.26* | 0.17        | 0.41        | -1.83* | -2.56       | -1.32       |
| Hypericum perforatum         | 17      | 2,177       | 0.21* | 0.13        | 0.35        | -2.12* | -2.94       | -1.55       |
| Agomelatine                  | 12      | 3,633       | 0.09* | 0.05        | 0.16        | -3.31* | -4.29       | -2.64       |
| Esketamine                   | 5       | 1,270       | 0.11* | 0.04        | 0.26        | -3.02* | -4.58       | -2.04       |

\*: not significant.

CI: confidence interval; IC: information component; n cases: number of cases of withdrawal syndrome; n non-cases: number of other adverse reactions excluding withdrawal syndrome; ROR: reporting odds ratio; SSRI: selective serotonin reuptake inhibitors.

**Table 4. Disproportionality intraclass analysis for TCAs**

| Drug | n cases | n non-cases | ROR | Lower 95%CI | Upper 95%CI | IC | Lower 95%CI | Upper 95%CI |
|------|---------|-------------|-----|-------------|-------------|----|-------------|-------------|
|------|---------|-------------|-----|-------------|-------------|----|-------------|-------------|

|               |     |        |       |      |      |        |       |       |
|---------------|-----|--------|-------|------|------|--------|-------|-------|
| Amitriptyline | 261 | 30,667 | 0.71* | 0.61 | 0.83 | -0.27* | -0.46 | -0.11 |
| Clomipramine  | 150 | 9,689  | 1.66  | 1.38 | 1.99 | 0.59   | 0.35  | 0.81  |
| Imipramine    | 84  | 5,557  | 1.54  | 1.23 | 1.94 | 0.55   | 0.22  | 0.84  |
| Doxepin       | 74  | 6,407  | 1.14* | 0.89 | 1.45 | 0.16*  | -0.18 | 0.47  |
| Nortriptyline | 69  | 7,581  | 0.87* | 0.68 | 1.12 | -0.18* | -0.54 | 0.14  |
| Desipramine   | 34  | 2,484  | 1.35* | 0.95 | 1.91 | 0.40*  | -0.12 | 0.85  |
| Lofepramine   | 8   | 3,322  | 0.22* | 0.11 | 0.45 | -2.03* | -3.20 | -1.20 |

\*: not significant.

CI: confidence interval; IC: information component; n cases: number of cases of withdrawal syndrome; n non-cases: number of other adverse reactions excluding withdrawal syndrome; ROR: reporting odds ratio.

**Table 5. Disproportionality intraclass analysis for SSRIs**

| Drug         | n cases | n non-cases | ROR   | Lower 95%CI | Upper 95%CI | IC     | Lower 95%CI | Upper 95%CI |
|--------------|---------|-------------|-------|-------------|-------------|--------|-------------|-------------|
| Paroxetine   | 10,074  | 70,143      | 9.13  | 8.79        | 9.48        | 1.57   | 1.54        | 1.60        |
| Sertraline   | 1,900   | 72,654      | 0.45* | 0.43        | 0.48        | -0.89* | -0.95       | -0.82       |
| Fluoxetine   | 853     | 72,835      | 0.18* | 0.17        | 0.20        | -2.04* | -2.14       | -1.95       |
| Citalopram   | 670     | 36,441      | 0.34* | 0.31        | 0.36        | -1.39* | -1.51       | -1.29       |
| Escitalopram | 590     | 33,089      | 0.33* | 0.30        | 0.36        | -1.44* | -1.56       | -1.32       |
| Fluvoxamine  | 130     | 9,901       | 0.25* | 0.21        | 0.30        | -1.88* | -2.14       | -1.64       |

\*: not significant.

CI: confidence interval; IC: information component; n cases: number of cases of withdrawal syndrome; n non-cases: number of other adverse reactions excluding withdrawal syndrome; ROR: reporting odds ratio; SSRI: selective serotonin reuptake inhibitors.

**Table 6. Disproportionality intraclass analysis for other antidepressants**

| Drug                 | n cases | n non-cases | ROR   | Lower 95%CI | Upper 95%CI | IC     | Lower 95%CI | Upper 95%CI |
|----------------------|---------|-------------|-------|-------------|-------------|--------|-------------|-------------|
| Duloxetine           | 8,583   | 65,203      | 3.71  | 3.60        | 3.83        | 1.14   | 1.11        | 1.18        |
| Venlafaxine          | 6,203   | 63,268      | 2.11  | 2.04        | 2.17        | 0.72   | 0.68        | 0.76        |
| Desvenlafaxine       | 1,701   | 17,822      | 1.74  | 1.65        | 1.83        | 0.68   | 0.61        | 0.75        |
| Bupropion            | 566     | 63,802      | 0.11* | 0.10        | 0.12        | -2.75* | -2.87       | -2.63       |
| Mirtazapine          | 306     | 27,061      | 0.17* | 0.15        | 0.19        | -2.39* | -2.56       | -2.24       |
| Trazodone            | 230     | 19,465      | 0.18* | 0.16        | 0.20        | -2.33* | -2.52       | -2.15       |
| Nefazodone           | 126     | 8,726       | 0.23* | 0.19        | 0.27        | -2.04* | -2.30       | -1.80       |
| Vortioxetine         | 60      | 13,423      | 0.07* | 0.05        | 0.09        | -3.72* | -4.11       | -3.38       |
| Vilazodone           | 55      | 4,898       | 0.18* | 0.14        | 0.23        | -2.40* | -2.80       | -2.04       |
| Milnacipran          | 40      | 4,329       | 0.15* | 0.11        | 0.20        | -2.67* | -3.15       | -2.26       |
| Mianserin            | 35      | 7,208       | 0.08* | 0.05        | 0.10        | -3.60* | -4.11       | -3.16       |
| Reboxetine           | 21      | 2,205       | 0.15* | 0.10        | 0.23        | -2.62* | -3.30       | -2.06       |
| Hypericum perforatum | 17      | 2,194       | 0.12* | 0.08        | 0.20        | -2.91* | -3.67       | -2.30       |
| Agomelatine          | 12      | 3,645       | 0.05* | 0.03        | 0.09        | -4.12* | -5.05       | -3.42       |
| Esketamine           | 5       | 1,275       | 0.06* | 0.03        | 0.15        | -3.80* | -5.32       | -2.80       |

\*: not significant.

CI: confidence interval; IC: information component; n cases: number of cases of withdrawal syndrome; n non-cases: number of other adverse reactions excluding withdrawal syndrome; ROR: reporting odds ratio.

**Table 7. Evaluation and classification of relevant disproportionality signals**

| Drug           | n cases | CRITERION 1           |       | CRITERION 2                          |       | CRITERION 3                  |            |                   |       | CRITERION 4                  |       | TOTAL SCORE | Priority level |
|----------------|---------|-----------------------|-------|--------------------------------------|-------|------------------------------|------------|-------------------|-------|------------------------------|-------|-------------|----------------|
|                |         | n cases / total n AEs | SCORE | n cases without confounders/ n cases | SCORE | Significance across analyses |            |                   | SCORE | Magnitude of ROR lower 95%CI | SCORE |             |                |
|                |         |                       |       |                                      |       | Main                         | Intraclass | vs. buprenorphine |       |                              |       |             |                |
| Paroxetine     | 10,074  | 14%                   | 2     | 86%                                  | 2     | yes                          | yes        | yes               | 2     | 44.07                        | 1     | 7           |                |
| Duloxetine     | 8,583   | 13%                   | 2     | 78%                                  | 2     | yes                          | yes        | yes               | 2     | 39.78                        | 1     | 7           |                |
| Venlafaxine    | 6,203   | 10%                   | 1     | 79%                                  | 2     | yes                          | yes        | yes               | 2     | 28.43                        | 1     | 6           |                |
| Desvenlafaxine | 1,701   | 10%                   | 1     | 74%                                  | 2     | yes                          | yes        | yes               | 2     | 26.96                        | 1     | 6           |                |
| Clomipramine   | 150     | 2%                    | 0     | 71%                                  | 2     | yes                          | yes        | no                | 1     | 3.60                         | 0     | 3           |                |
| Sertraline     | 1,900   | 3%                    | 0     | 77%                                  | 2     | yes                          | no         | no                | 0     | 6.89                         | 0     | 2           |                |
| Citalopram     | 670     | 2%                    | 0     | 72%                                  | 2     | yes                          | no         | no                | 0     | 4.66                         | 0     | 2           |                |
| Imipramine     | 84      | 2%                    | 0     | 55%                                  | 1     | yes                          | yes        | No                | 1     | 3.32                         | 0     | 2           |                |
| Vilazodone     | 55      | 1%                    | 0     | 73%                                  | 2     | yes                          | no         | no                | 0     | 2.34                         | 0     | 2           |                |
| Fluoxetine     | 853     | 1%                    | 0     | 63%                                  | 1     | yes                          | no         | no                | 0     | 2.98                         | 0     | 1           |                |
| Escitalopram   | 590     | 2%                    | 0     | 65%                                  | 1     | yes                          | no         | no                | 0     | 4.50                         | 0     | 1           |                |
| Bupropion      | 566     | 1%                    | 0     | 50%                                  | 1     | yes                          | no         | no                | 0     | 2.21                         | 0     | 1           |                |
| Doxepin        | 74      | 1%                    | 0     | 51%                                  | 1     | yes                          | no         | no                | 0     | 2.5                          | 0     | 1           |                |
| Mirtazapine    | 306     | 1%                    | 0     | 56%                                  | 1     | yes                          | no         | no                | 0     | 2.75                         | 0     | 1           |                |
| Fluvoxamine    | 130     | 1%                    | 0     | 64%                                  | 1     | yes                          | no         | no                | 0     | 3.01                         | 0     | 1           |                |
| Nefazodone     | 126     | 1%                    | 0     | 63%                                  | 1     | yes                          | no         | no                | 0     | 3.30                         | 0     | 1           |                |
| Nortriptyline  | 69      | 1%                    | 0     | 46%                                  | 0     | yes                          | no         | no                | 1     | 1.95                         | 0     | 1           |                |
| Amitriptyline  | 261     | 1%                    | 0     | 44%                                  | 0     | yes                          | no         | no                | 0     | 2.04                         | 0     | 0           |                |
| Trazodone      | 230     | 1%                    | 0     | 0%                                   | 0     | yes                          | no         | no                | 0     | 2.82                         | 0     | 0           |                |
| Milnacipran    | 40      | 1%                    | 0     | 43%                                  | 0     | yes                          | no         | no                | 0     | 1.84                         | 0     | 0           |                |
| Desipramine    | 34      | 1%                    | 0     | 47%                                  | 0     | yes                          | no         | no                | 0     | 2.66                         | 0     | 0           |                |
| Reboxetine     | 21      | 1%                    | 0     | 48%                                  | 0     | yes                          | no         | no                | 0     | 1.68                         | 0     | 0           |                |

AEs=adverse events; CI=confidence interval; n cases: number of cases of withdrawal syndrome; total n AEs: number of all adverse events; ROR: reporting odds ratio.





**Table 8. Symptoms reported in association with withdrawal reaction**

| Symptoms                 | N     | Frequency % |
|--------------------------|-------|-------------|
| Dizziness                | 2,731 | 13.13       |
| Nausea                   | 1,972 | 9.48        |
| Paraesthesia             | 1,726 | 8.30        |
| Headache                 | 1,529 | 7.35        |
| Anxiety                  | 1,189 | 5.72        |
| Feeling abnormal         | 971   | 4.67        |
| Suicidal ideation        | 969   | 4.66        |
| Insomnia                 | 853   | 4.10        |
| Depression               | 826   | 3.97        |
| Fatigue                  | 772   | 3.71        |
| Tremor                   | 761   | 3.66        |
| Hyperhidrosis            | 744   | 3.58        |
| Agitation                | 663   | 3.19        |
| Vomiting                 | 629   | 3.02        |
| Vertigo                  | 608   | 2.92        |
| Malaise                  | 593   | 2.85        |
| Confusional state        | 587   | 2.82        |
| Disturbance in attention | 564   | 2.71        |
| Crying                   | 554   | 2.66        |
| Irritability             | 538   | 2.59        |
| Nightmare                | 538   | 2.59        |
| Diarrhoea                | 521   | 2.51        |
| Aggression               | 506   | 2.43        |
| Tinnitus                 | 437   | 2.10        |
| Weight increased         | 420   | 2.02        |
| Influenza like illness   | 392   | 1.88        |
| Anger                    | 389   | 1.87        |
| Nervousness              | 357   | 1.72        |
| Pain                     | 350   | 1.68        |
| Dependence               | 348   | 1.67        |
| Asthenia                 | 341   | 1.64        |
| Abnormal dreams          | 316   | 1.52        |
| Memory impairment        | 313   | 1.50        |
| Sleep disorder           | 296   | 1.42        |
| Palpitations             | 285   | 1.37        |
| Mood swings              | 280   | 1.35        |
| Panic attack             | 255   | 1.23        |
| Vision blurred           | 243   | 1.17        |
| Visual impairment        | 239   | 1.15        |
| Emotional disorder       | 229   | 1.10        |
| Migraine                 | 224   | 1.08        |
| Hypoaesthesia            | 220   | 1.06        |
| Balance disorder         | 215   | 1.03        |
| Lethargy                 | 214   | 1.03        |

## References

1. Lindquist M. VigiBase, the WHO Global ICSR Database System: Basic Facts. *Drug Information Journal*. 2008;42(5):409-19.
2. WHO. ATC/DDD index 2021 [https://www.whocc.no/atc\\_ddd\\_index/](https://www.whocc.no/atc_ddd_index/). Accessed February 2021.
3. WHO. MedDRA Hierarchy 2021 <https://www.meddra.org/how-to-use/basics/hierarchy>. Accessed February 2021.
4. Centre UM. Individual case safety reports and VigiBase – the vital importance of quality 2017 [Available from: <https://www.who-umc.org/media/163807/vigibase-the-vital-importance-of-quality-2017.pdf>. Accessed Jan 1, 2021
5. Hosenbocus S, Chahal R. SSRIs and SNRIs: A review of the Discontinuation Syndrome in Children and Adolescents. *J Can Acad Child Adolesc Psychiatry*. 2011;20(1):60-7.
6. Sanz EJ, De-las-Cuevas C, Kiuru A, Bate A, Edwards R. Selective serotonin reuptake inhibitors in pregnant women and neonatal withdrawal syndrome: a database analysis. *The Lancet*. 2005;365(9458):482-7
7. World Health Organization. DDD: Definition and general considerations [https://www.whocc.no/ddd/definition\\_and\\_general\\_considera/#General](https://www.whocc.no/ddd/definition_and_general_considera/#General). Accessed February 2021.
8. van Puijenbroek EP, Bate A, Leufkens HG, Lindquist M, Orre R, Egberts AC. A comparison of measures of disproportionality for signal detection in spontaneous reporting systems for adverse drug reactions. *Pharmacoepidemiol Drug Saf*. 2002;11(1):3-10.
9. Rothman KJ, Lanes S, Sacks ST. The reporting odds ratio and its advantages over the proportional reporting ratio. *Pharmacoepidemiol Drug Saf*. 2004;13(8):519-23.
10. Bate A, Lindquist M, Edwards IR, Olsson S, Orre R, Lansner A, et al. A Bayesian neural network method for adverse drug reaction signal generation. *Eur J Clin Pharmacol*. 1998;54(4):315-21.
11. Pace ND, Multani JK. On the Reporting of Odds Ratios and Risk Ratios. *Nutrients*. 2018;10(10).
12. Caster O, Juhlin K, Watson S, Noren GN. Improved statistical signal detection in pharmacovigilance by combining multiple strength-of-evidence aspects in vigiRank. *Drug safety*. 2014;37(8):617-28.
13. Bate A, Evans SJ. Quantitative signal detection using spontaneous ADR reporting. *Pharmacoepidemiol Drug Saf*. 2009;18(6):427-36.
14. Dijkstra L, Garling M, Foraita R, Pigeot I. Adverse drug reaction or innocent bystander? A systematic comparison of statistical discovery methods for spontaneous reporting systems. *Pharmacoepidemiol Drug Saf*;29(4):396-403.
15. Maciá-Martínez MA, de Abajo FJ, Roberts G, Slattery J, Thakrar B, Wisniewski AF. An Empirical Approach to Explore the Relationship Between Measures of Disproportionate Reporting and Relative Risks from Analytical Studies. *Drug safety*. 2016;39(1):29-43.
